# Supplementary material
Source: PubMed Central journal article supplement (PMC5703213)
Supplement: NIHMS824365-supplement-Supplemental_Material.pdf [file NIHMS824365-supplement-Supplemental_Material.pdf]

## Supplemental Material

The following supplemental sections are provided as additional information:

*Supplement 1: Study Timeline*

*Supplement 2: CMR Imaging Parameters*

*Supplement 3: CMR Image Analysis*

*Supplement 4: Antibodies Used for Histopathology*

*Supplement 5: Iron Overloading within Lysosomes*

*Supplement 6: Summary on Infarct Characteristics*

*Supplement 7: Summary on Structural Remodeling*

*Supplement 8: Details on Functional Remodeling*

### Supplement 1: Study Timeline

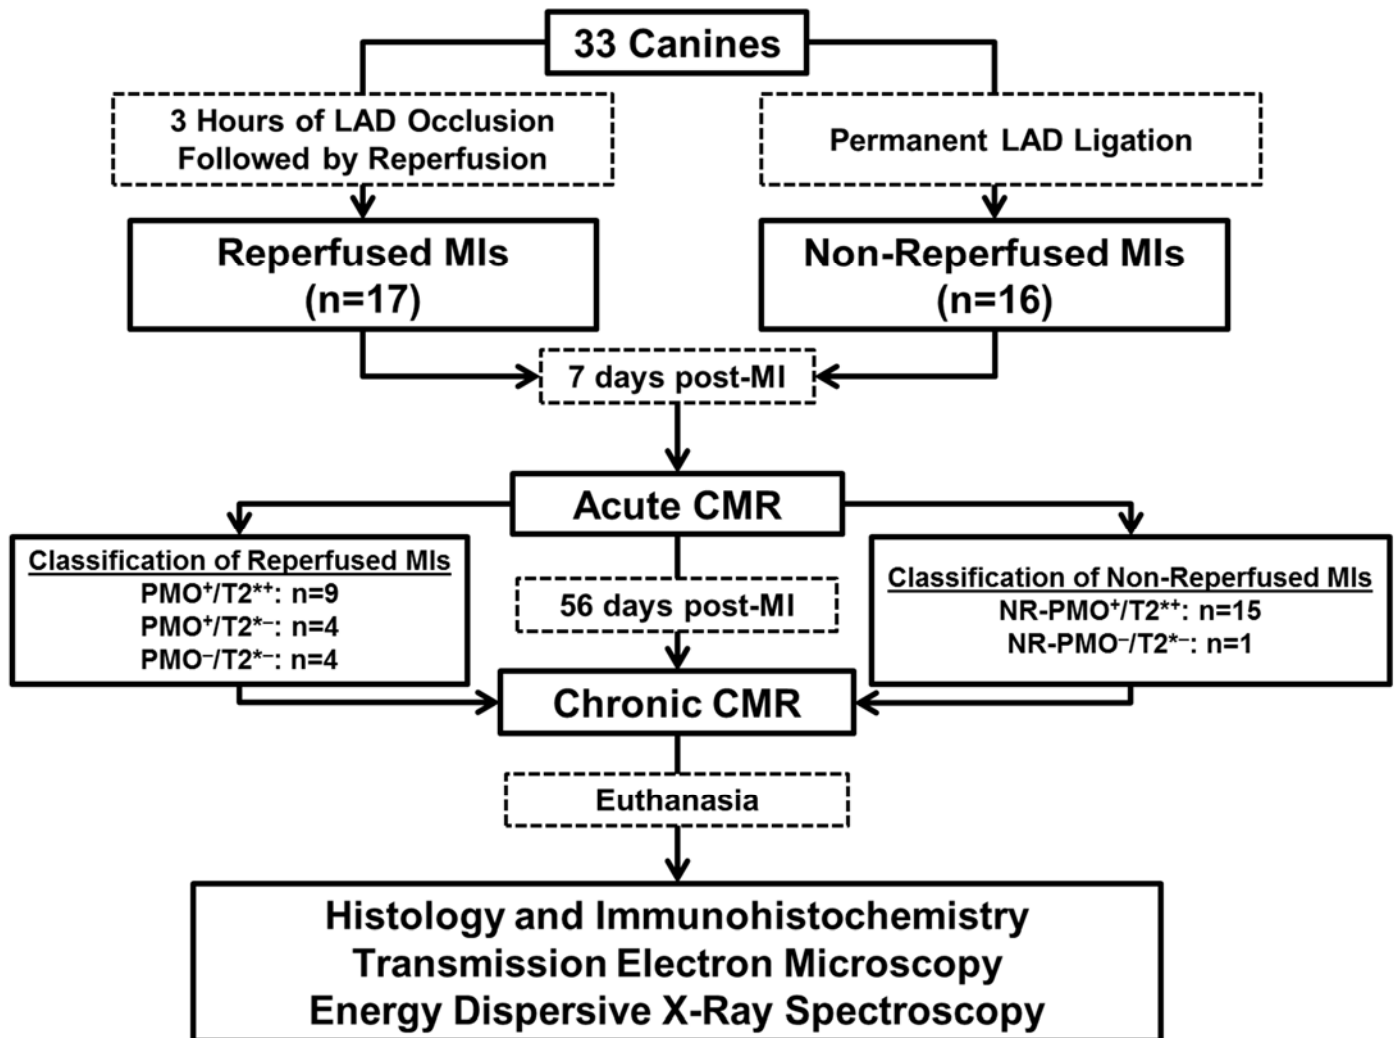

## Supplement 2: Cardiac MR Imaging Parameters

**Table S1.** Cardiac MR imaging parameters for studying acute and chronic reperfused and non-reperfused myocardial infarctions.

| <b>Imaging Method</b>       | Cine                      | T2*-weighted                         | LGE                                      |
|-----------------------------|---------------------------|--------------------------------------|------------------------------------------|
| <b>Sequence</b>             | Balanced SSFP             | Multiple GRE                         | IR – prepared GRE                        |
| <b>TR (ms)</b>              | 3.1                       | 12.0                                 | 3.0                                      |
| <b>TE (ms)</b>              | 1.6                       | 2.0 – 9.5<br>( $\Delta$ TE = 1.5 ms) | 1.5                                      |
| <b>Flip Angle</b>           | 40°                       | 10°                                  | 25°                                      |
| <b>Bandwidth (Hz/pixel)</b> | 930                       | 930                                  | 586                                      |
| <b>In-plane Resolution</b>  | 1.4 x 1.4 mm <sup>2</sup> |                                      |                                          |
| <b>Slice Thickness</b>      | 6mm                       |                                      |                                          |
| <b>Other Parameters</b>     | 25-30 cardiac phases      | 6 TEs                                | Optimal TI to null the remote myocardium |

### **Supplement 3: CMR Image Analysis**

All cardiac MRI (CMR) image analyses were performed on cvi<sup>42</sup> image processing software (Circle Cardiovascular Imaging Inc., Calgary, AB). Endocardial and epicardial contours were manually drawn on all images. Remote myocardium was identified on LGE images as the region showing no hyperintensity and a reference region-of-interest (ROI) was drawn in it. Infarcted myocardium was then defined on LGE images using the Mean + 5 Standard Deviations (SD) technique relative to the reference ROI. Persistent microvascular obstruction (PMO) was defined as the hypointense core within the hyperintense infarcted myocardium identified on LGE images using the Mean+5SD criterion. Infarct size was calculated by summing the volumes of the hyperintense regions on LGE images identified using the Mean+5SD criterion and the hypointense PMO cores.

The presence of iron arising from blood degradation within infarcted myocardium were identified as hypointense regions on T2\*-weighted images confined to the hyperintense LGE territory. The reference ROIs drawn on LGE images were copied on to the corresponding T2\*-weighted images. Spatial extent of the hypointense regions were identified on the T2\*-weighted image acquired at TE=6.5ms using the Mean-2SD criterion relative to the reference ROI. Off-resonance artifacts arising due to susceptibility differences at the heart-lung interface were manually excluded.

#### Supplement 4: Antibodies Used for Histopathology

**Table S2.** *Antibodies used for studying different histopathological markers*

| Histopathological Marker | Antibody Used   |
|--------------------------|-----------------|
| CD163                    | Bioss, bs-2527R |
| Mac387                   | Abcam, ab22506  |
| IL-1 $\beta$             | Abcam, ab34837  |
| TNF- $\alpha$            | Abcam, ab6671   |
| MMP-9                    | Abcam, ab38898  |

## Supplement 5: Iron Overloading within Lysosomes

Figure S1 below shows potential overloading of lysosomes within macrophages.

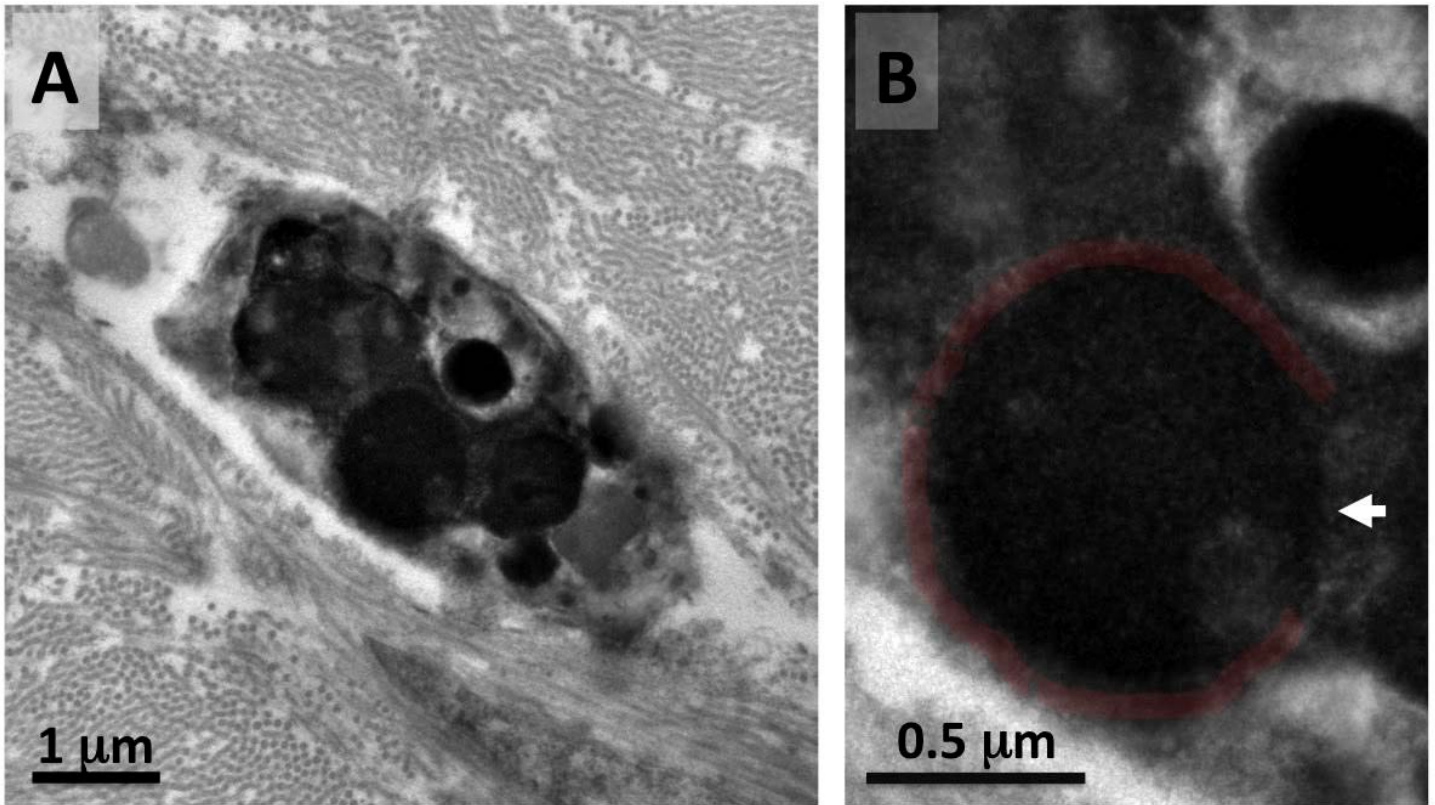

**Figure S1.** *TEM of Iron Overloaded Lysosomes within a Macrophage.* Panel **A** shows several membrane enclosed spherical organelles, which are consistent with previous description of lysosomes. Panel **B** shows an enlarged version of a potential lysosome (with membrane highlighted in red), which contains electro dense material (iron) whose diameter is well in excess of 1 µm with potential membrane disruption indicated by white arrow.

## Supplement 6: Summary on Infarct Characteristics

Table S3 below provides details on infarct volume, PMO/NR-PMO volume, and iron volume in acute and chronic phases of reperfused and non-reperfused myocardial infarctions.

**Table S3.** Summary of infarct characteristics between reperfused and non-reperfused MI

| <b>INFARCT CHARACTERISTICS: REPERFUSED VS. NON-REPERFUSED MI</b> |                                            |                             |                                |                          |
|------------------------------------------------------------------|--------------------------------------------|-----------------------------|--------------------------------|--------------------------|
| <b>Phase of MI</b>                                               | <b>Group</b>                               | <b>Infarct Volume (%LV)</b> | <b>PMO/NR-PMO Volume (%LV)</b> | <b>Iron Volume (%LV)</b> |
| <b>Acute</b>                                                     | Reperfused (n=17)<br>(Median (Q1-Q3))      | 20.7<br>(18.1-33.6)         | 1.7<br>(1.2-7.1)               | 0.45<br>(0.0-8.3)        |
|                                                                  | Non-Reperfused (n=16)<br>(Median (Q1-Q3))  | 16.2<br>(7.7-20.0)          | 2.2<br>(1.1-4.2)               | 1.4<br>(1.0-3.7)         |
|                                                                  | p-value<br>(Reperfused vs. Non-Reperfused) | 0.052                       | 0.86                           | 0.86                     |
| <b>Chronic</b>                                                   | Reperfused (n=17)<br>(Median (Q1-Q3))      | 11.3<br>(6.2-15)            | 0<br>(-)                       | 2.9<br>(0.7-4.3)         |
|                                                                  | Non-Reperfused (n=16)<br>(Median (Q1-Q3))  | 7.0<br>(2.7-9.8)            | 0<br>(-)                       | 1.6<br>(0.8-3.3)         |
|                                                                  | p-value<br>(Reperfused vs. Non-Reperfused) | 0.38                        | -                              | 0.38                     |

\*Statistically significant difference (p<0.05)

## Supplement 7: Summary on Structural Remodeling

**Table S4** below provides details on structural LV remodeling in acute and chronic phases of reperfused and non-reperfused myocardial infarctions.

**Table S4.** *Summary of structural LV remodeling between reperfused and non-reperfused MI*

| <b>STRUCTURAL LV REMODELING REPERFUSED VS. NON-REPERFUSED MI</b> |                                            |                                       |
|------------------------------------------------------------------|--------------------------------------------|---------------------------------------|
| <b>Phase of MI</b>                                               | <b>Group</b>                               | <b>End-Diastolic Sphericity Index</b> |
| <b>Acute</b>                                                     | Reperfused (n=17)<br>(Median (Q1-Q3))      | 0.43<br>(0.38-0.53)                   |
|                                                                  | Non-Reperfused (n=16)<br>(Median (Q1-Q3))  | 0.42<br>(0.39-0.47)                   |
|                                                                  | p-value<br>(Reperfused vs. Non-Reperfused) | 0.46                                  |
| <b>Chronic</b>                                                   | Reperfused (n=17)<br>(Median (Q1-Q3))      | 0.49<br>(0.41-0.58)                   |
|                                                                  | Non-Reperfused (n=16)<br>(Median (Q1-Q3))  | 0.49<br>(0.44-0.56)                   |
|                                                                  | p-value<br>(Reperfused vs. Non-Reperfused) | 0.79                                  |

\*Statistically significant difference ( $p < 0.05$ )

## Supplement 8: Summary on Functional Remodeling

Tables S5 through S8 below provide details on functional LV remodeling in acute and chronic phases of reperfused and non-reperfused myocardial infarctions. Table S9 compares reperfused and non-reperfused myocardial infarctions in terms of functional LV remodeling.

**Table S5.** Functional LV remodeling in reperfused myocardial infarctions

| <b>REPERFUSED MYOCARDIAL INFARCTIONS</b>                            |                                |                                                |                                               |                              |
|---------------------------------------------------------------------|--------------------------------|------------------------------------------------|-----------------------------------------------|------------------------------|
| <b>Group</b>                                                        | <b>Parameter</b>               | <b>End-Diastolic Volume (mL/m<sup>2</sup>)</b> | <b>End-Systolic Volume (mL/m<sup>2</sup>)</b> | <b>Ejection Fraction (%)</b> |
| <b>PMO<sup>+</sup>/T<sub>2</sub><sup>*+</sup></b><br><b>(n = 9)</b> | Acute<br>(Median (Q1-Q3))      | 67.4<br>(58.4-76.3)                            | 47.5<br>(42.4-56.5)                           | 28.5<br>(25.1-36.8)          |
|                                                                     | Chronic<br>(Median (Q1-Q3))    | 75.5<br>(69.4-85.1)                            | 58.4<br>(51.3-68.9)                           | 21.5<br>(14.6-24.2)          |
|                                                                     | % Change<br>(Acute to Chronic) | 16.0<br>(8.7-22.2)                             | 19.3<br>(11.8-29.3)                           | -23.5<br>(-32.0-13.7)        |
|                                                                     | p-value<br>(Acute vs. Chronic) | 0.008*                                         | 0.01*                                         | 0.03*                        |
| <b>PMO<sup>+</sup>/T<sub>2</sub><sup>*-</sup></b><br><b>(n = 4)</b> | Acute<br>(Median (Q1-Q3))      | 56.4<br>(54.1-58.3)                            | 33.7<br>(27.8-46.4)                           | 40.2<br>(36.3-46.3)          |
|                                                                     | Chronic<br>(Median (Q1-Q3))    | 60.0<br>(54.1-65.1)                            | 35.2<br>(29.2-40.0)                           | 42.1<br>(36.2-49.6)          |
|                                                                     | % Change<br>(Acute to Chronic) | 5.8<br>(-1.0-12.3)                             | 0.7<br>(-6.7-8.4)                             | 2.2<br>(-7.1-9.4)            |
|                                                                     | p-value<br>(Acute vs. Chronic) | 0.30                                           | 0.43                                          | 0.81                         |
| <b>PMO<sup>-</sup>/T<sub>2</sub><sup>*-</sup></b><br><b>(n = 4)</b> | Acute<br>(Median (Q1-Q3))      | 48.2<br>(46.1-49.1)                            | 29.3<br>(24.6-31.9)                           | 44.6<br>(41.4-53.1)          |
|                                                                     | Chronic<br>(Median (Q1-Q3))    | 45.0<br>(41.0-48.3)                            | 30.4<br>(20.8-39.1)                           | 46.3<br>(39.7-53.0)          |
|                                                                     | % Change<br>(Acute to Chronic) | 2.5<br>(-8.2-3.5)                              | -3.4<br>(-9.0-0.5)                            | 1.4<br>(-6.9-7.3)            |
|                                                                     | p-value<br>(Acute vs. Chronic) | 0.32                                           | 0.81                                          | 0.88                         |

\*Statistically significant difference (p<0.05)



**Table S6.** Comparison of functional LV remodeling across groups in reperfused myocardial infarctions

| <b>REPERFUSED MYOCARDIAL INFARCTIONS</b> |                                             |                                                                                                          |                                                                                                          |                                                                                                          |
|------------------------------------------|---------------------------------------------|----------------------------------------------------------------------------------------------------------|----------------------------------------------------------------------------------------------------------|----------------------------------------------------------------------------------------------------------|
| <b>Parameter</b>                         | <b>Phase of MI</b>                          | <b>PMO<sup>+</sup>/T<sub>2</sub><sup>*+</sup><br/>vs.<br/>PMO<sup>+</sup>/T<sub>2</sub><sup>*-</sup></b> | <b>PMO<sup>+</sup>/T<sub>2</sub><sup>*+</sup><br/>vs.<br/>PMO<sup>-</sup>/T<sub>2</sub><sup>*-</sup></b> | <b>PMO<sup>+</sup>/T<sub>2</sub><sup>*-</sup><br/>vs.<br/>PMO<sup>-</sup>/T<sub>2</sub><sup>*-</sup></b> |
| <b>EDV</b>                               | p-value (Acute)                             | 0.01*                                                                                                    | 0.02*                                                                                                    | 0.13                                                                                                     |
|                                          | p-value (Chronic)                           | 0.02*                                                                                                    | 0.003*                                                                                                   | 0.04*                                                                                                    |
|                                          | p-value<br>(ΔEDV between Acute and Chronic) | 0.03*                                                                                                    | 0.03*                                                                                                    | 0.21                                                                                                     |
| <b>ESV</b>                               | p-value (Acute)                             | 0.001*                                                                                                   | <0.001*                                                                                                  | 0.22                                                                                                     |
|                                          | p-value (Chronic)                           | 0.007*                                                                                                   | 0.002*                                                                                                   | 0.17                                                                                                     |
|                                          | p-value<br>(ΔESV between Acute and Chronic) | 0.01*                                                                                                    | 0.008*                                                                                                   | 0.65                                                                                                     |
| <b>EF</b>                                | p-value (Acute)                             | 0.01*                                                                                                    | 0.01*                                                                                                    | 0.65                                                                                                     |
|                                          | p-value (Chronic)                           | 0.03*                                                                                                    | 0.01*                                                                                                    | 0.08                                                                                                     |
|                                          | p-value<br>(ΔEF between Acute and Chronic)  | 0.04*                                                                                                    | 0.02*                                                                                                    | 0.51                                                                                                     |

\*Statistically significant difference (p<0.05)

**Table S7. Functional LV remodeling in non-reperfused myocardial infarctions**

| <b>NON-REPERFUSED MYOCARDIAL INFARCTIONS</b>                            |                                |                                                |                                               |                              |
|-------------------------------------------------------------------------|--------------------------------|------------------------------------------------|-----------------------------------------------|------------------------------|
| <b>Group</b>                                                            | <b>Parameter</b>               | <b>End-Diastolic Volume (mL/m<sup>2</sup>)</b> | <b>End-Systolic Volume (mL/m<sup>2</sup>)</b> | <b>Ejection Fraction (%)</b> |
| <b>NR-PMO<sup>+</sup>/T<sub>2</sub><sup>*+</sup></b><br><b>(n = 15)</b> | Acute<br>(Median (Q1-Q3))      | 58.5<br>(55.2-69.3)                            | 37.8<br>(34.6-47.9)                           | 34.6<br>(30.5-29.2)          |
|                                                                         | Chronic<br>(Median (Q1-Q3))    | 74.1<br>(70.5-79.2)                            | 44.2<br>(39.3-54.6)                           | 38.1<br>(32.3-44.7)          |
|                                                                         | % Change<br>(Acute to Chronic) | 19.1<br>(11.6-29.6)                            | 14.3<br>(8.2-28.4)                            | 8.2<br>(-2.0-14.6)           |
|                                                                         | p-value<br>(Acute vs. Chronic) | 0.001*                                         | 0.003*                                        | 0.14                         |
| <b>NR-PMO<sup>-</sup>/T<sub>2</sub><sup>*-</sup></b><br><b>(n = 1)</b>  | Acute<br>(Median (Q1-Q3))      | 56.1                                           | 32.0                                          | 43.0                         |
|                                                                         | Chronic<br>(Median (Q1-Q3))    | 67.4                                           | 37.8                                          | 43.9                         |
|                                                                         | % Change<br>(Acute to Chronic) | 20.1                                           | 18.1                                          | 7.6                          |
|                                                                         | p-value<br>(Acute vs. Chronic) | –                                              | –                                             | –                            |

\*Statistically significant difference (p&lt;0.05)

**Table S8.** Comparison of functional LV remodeling across groups in non-reperfused myocardial infarctions

| <b>NON-REPERFUSED MYOCARDIAL INFARCTIONS</b> |                                                      |                                                                                                                |
|----------------------------------------------|------------------------------------------------------|----------------------------------------------------------------------------------------------------------------|
| <b>Parameter</b>                             | <b>Phase of MI</b>                                   | <b>NR-PMO<sup>+</sup>/T<sub>2</sub><sup>*+</sup><br/>vs.<br/>NR-PMO<sup>+</sup>/T<sub>2</sub><sup>*-</sup></b> |
| <b>EDV</b>                                   | p-value (Acute)                                      | 0.04*                                                                                                          |
|                                              | p-value (Chronic)                                    | 0.01*                                                                                                          |
|                                              | p-value<br>( $\Delta$ EDV between Acute and Chronic) | 0.65                                                                                                           |
| <b>ESV</b>                                   | p-value (Acute)                                      | 0.005*                                                                                                         |
|                                              | p-value (Chronic)                                    | 0.003*                                                                                                         |
|                                              | p-value<br>( $\Delta$ ESV between Acute and Chronic) | 0.06                                                                                                           |
| <b>EF</b>                                    | p-value (Acute)                                      | 0.005*                                                                                                         |
|                                              | p-value (Chronic)                                    | 0.01*                                                                                                          |
|                                              | p-value<br>( $\Delta$ EF between Acute and Chronic)  | 0.91                                                                                                           |

\*Statistically significant difference (p<0.05)

**Table S9.** Summary of functional LV remodeling between reperfused and non-reperfused MI

| <b>FUNCTIONAL LV REMODELING: REPERFUSED VS. NON-REPERFUSED MI</b> |                                            |                              |                                                |                                               |
|-------------------------------------------------------------------|--------------------------------------------|------------------------------|------------------------------------------------|-----------------------------------------------|
| <b>Phase of MI</b>                                                | <b>Parameter</b>                           | <b>Ejection Fraction (%)</b> | <b>End-Diastolic Volume (mL/m<sup>2</sup>)</b> | <b>End-Systolic Volume (mL/m<sup>2</sup>)</b> |
| <b>Acute</b>                                                      | Reperfused (n=17)<br>(Median (Q1-Q3))      | 39.1<br>(30.4-48.1)          | 55.3<br>(49.8-62.9)                            | 33.9<br>(27.8-44.6)                           |
|                                                                   | Non-Reperfused (n=16)<br>(Median (Q1-Q3))  | 36.0<br>(30.7-40.3)          | 57.5<br>(55.6-69.6)                            | 37.2<br>(32.1-46.0)                           |
|                                                                   | p-value<br>(Reperfused vs. Non-Reperfused) | 0.21                         | 0.33                                           | 0.27                                          |
| <b>Chronic</b>                                                    | Reperfused (n=17)<br>(Median (Q1-Q3))      | 39.4<br>(25.8-48.6)          | 68.1<br>(57.4-79.2)                            | 35.5<br>(26.2-49.2)                           |
|                                                                   | Non-Reperfused (n=16)<br>(Median (Q1-Q3))  | 38.6<br>(32.4-45.0)          | 73.3<br>(69.1-78.0)                            | 42.1<br>(39.1-53.2)                           |
|                                                                   | p-value<br>(Reperfused vs. Non-Reperfused) | 0.12                         | 0.65                                           | 0.76                                          |

\*Statistically significant difference (p<0.05)
